# Supplementary material for: The B-Type Cyclin CYCB1-1 Regulates Embryonic Development and Seed Size in Maize
Source: MDPI journal article supplement (doi:10.3390/ijms23115907), 2022-05-25
Supplement: s1 [file s1]

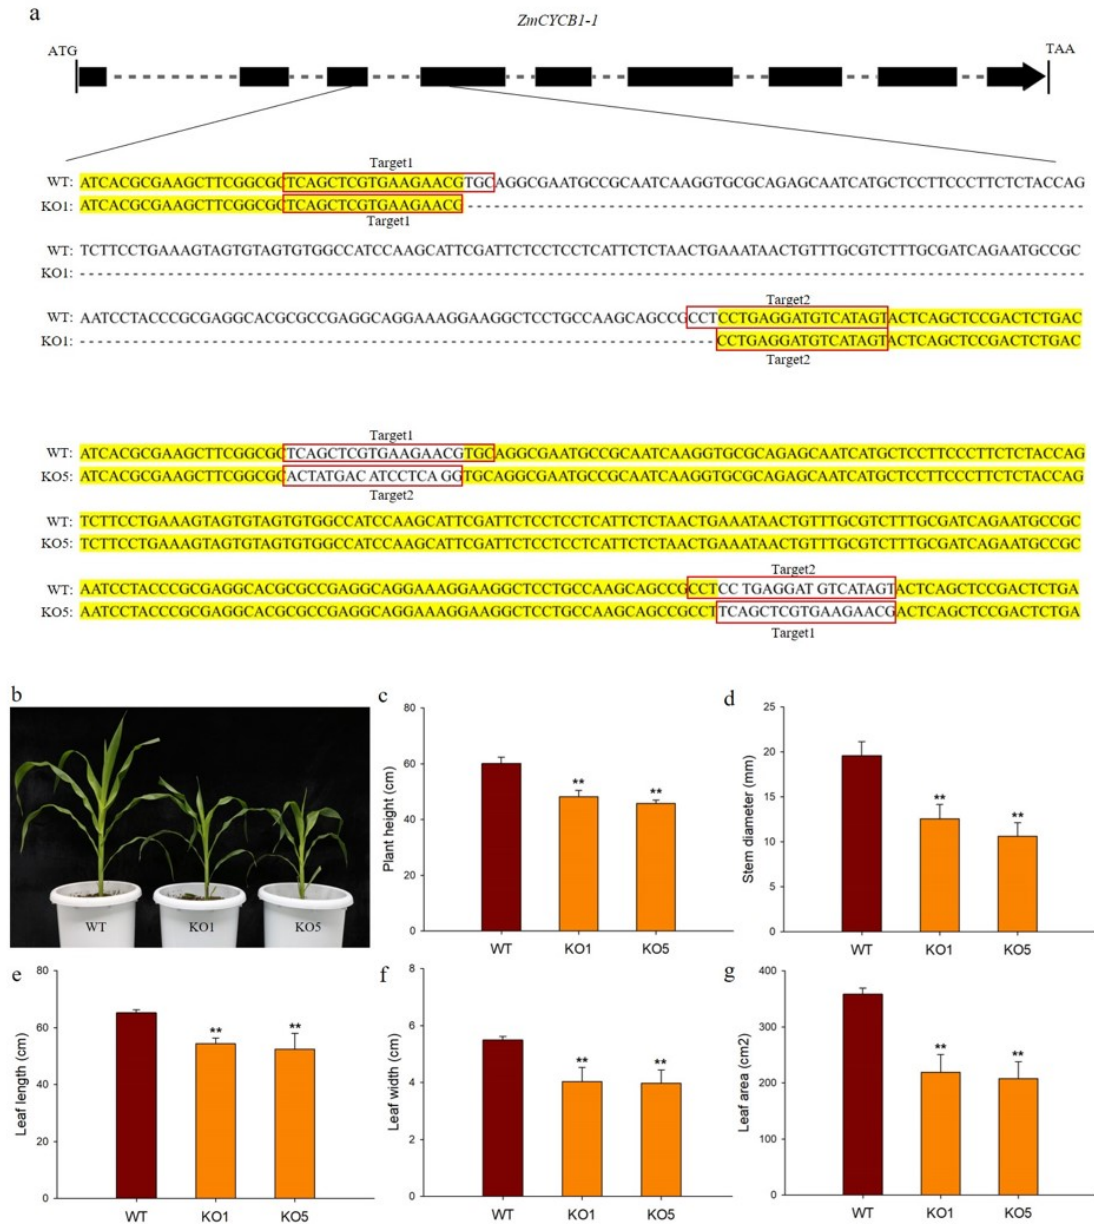

**Figure S1.** Phenotypic analysis of *ZmCYCB1-1* knockout lines. **a.** Alignment of *ZmCYCB1-1* sequences of the WT and two homozygous knockout lines (KO1 and KO5). Filled black squares represent exons, horizontal dotted lines represent introns, and the target sites are highlighted by red boxes, identical sequences are colored in yellow. **b.** the WT and *ZmCYCB1-1* knockout plants at the V6 stage. **c.** Plant height of the WT and *ZmCYCB1-1* knockout plants. **d.** Stem diameter of the WT and *ZmCYCB1-1* knockout plants. **e.** Leaf length of the WT and *ZmCYCB1-1* knockout plants. **f.** Leaf width of the WT and *ZmCYCB1-1* knockout plants. **g.** Leaf area of the WT and *ZmCYCB1-1* knockout plants. Student's *t* test, \*\*  $p < 0.01$ .

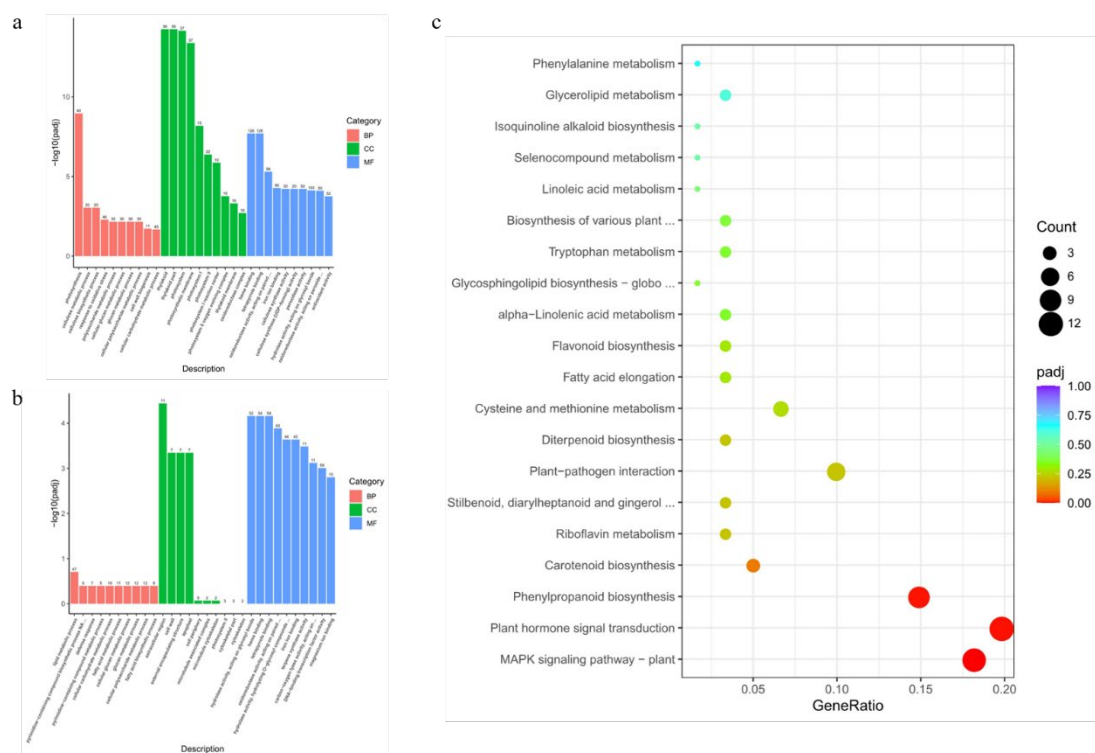

**Figure S2.** Functional enrichment analysis of DEGs in the OE lines. **a.** GO enrichment analysis of DEGs identified in OE49 leaves. **b.** GO enrichment analysis of DEGs identified in OE8 leaves. **c.** KEGG pathway analysis of DEGs identified in the stems of OE49 and OE8.

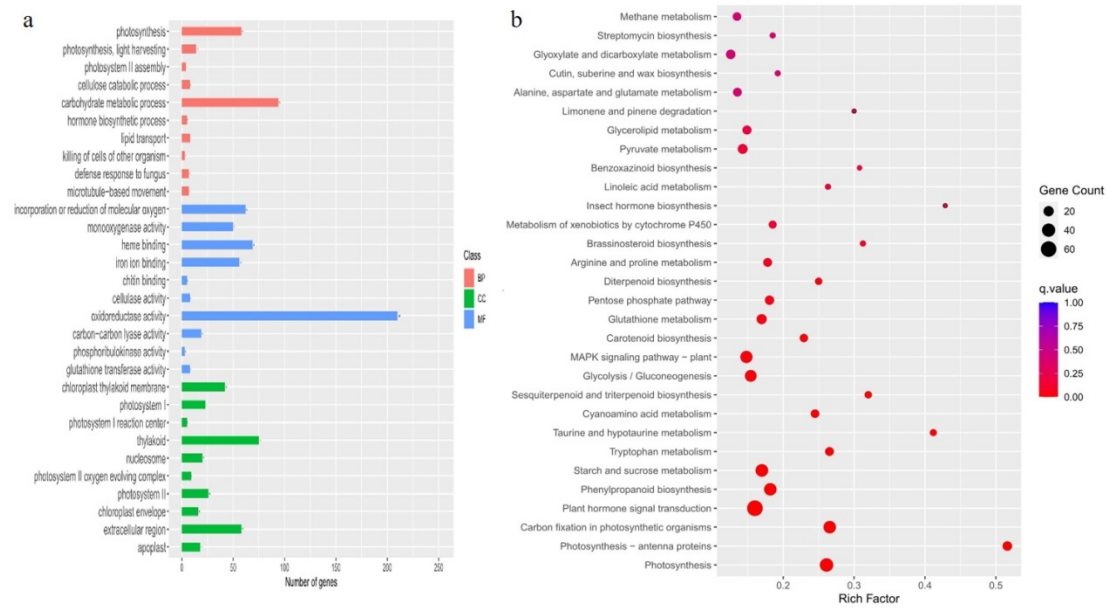

**Figure S3.** Functional enrichment analysis of DEGs between OE49 and WT embryos. **a.** GO Functional enrichment analysis of DEGs. **b.** KEGG pathway enrichment analysis of DEGs.

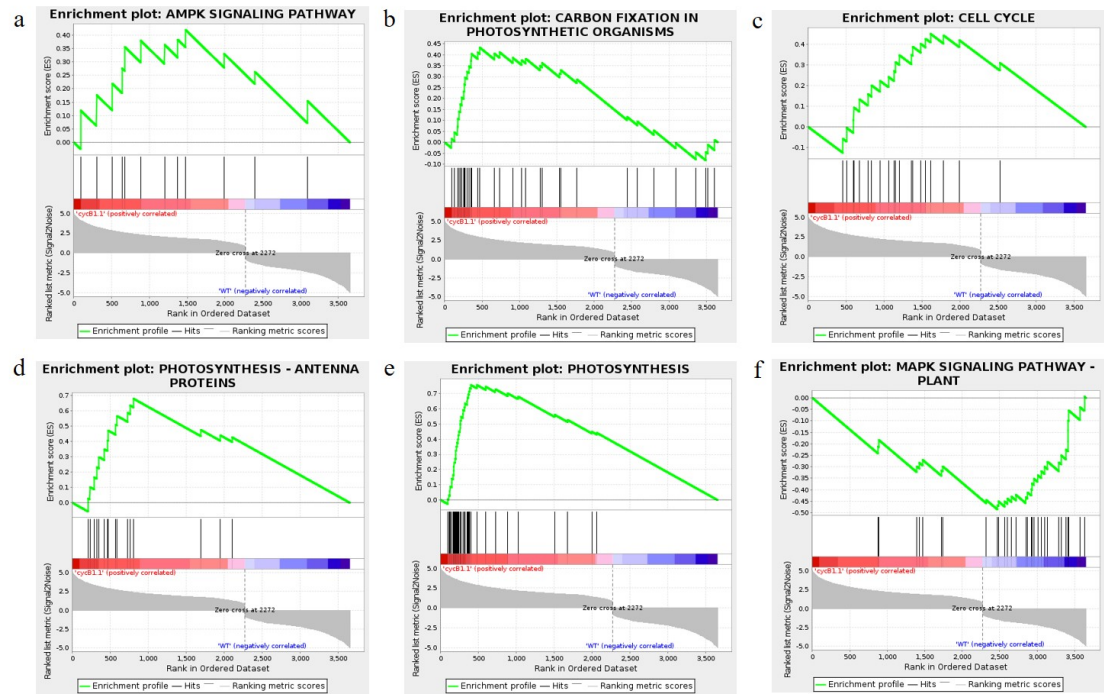

**Figure S4.** Gene set enrichment analysis (GSEA) of DEGs between OE49 and WT embryos. a-f represent gene sets 1-6.

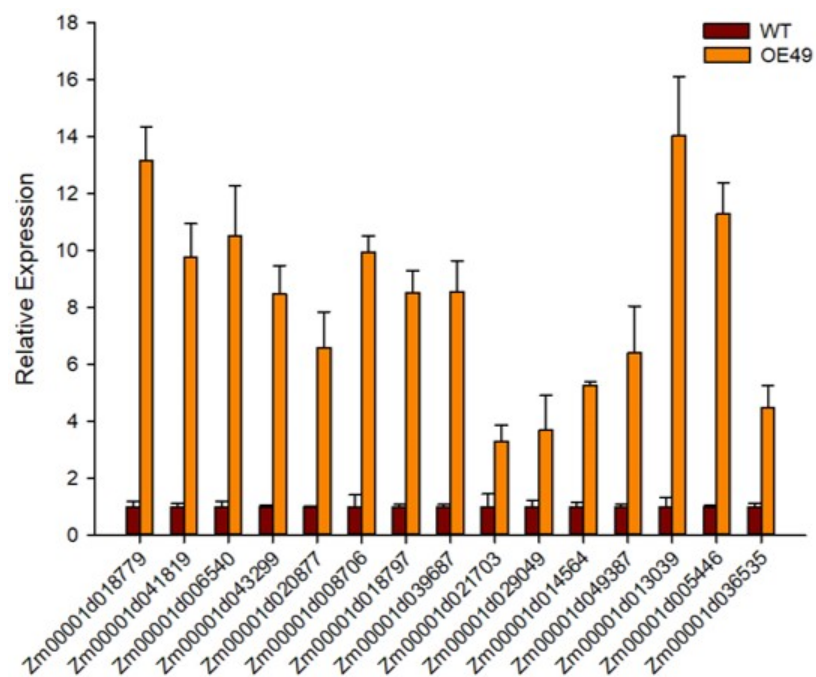

**Figure S5.** Relative expression levels of photosynthesis-related genes identified by GSEA in WT and OE49 embryos. The expression level of all genes in WT set to 1.

**Table S1.** Gene information related to photosynthesis in GSEA analysis.

| Gene id        | Description                                               | Primers                                                               | Up-regulated |
|----------------|-----------------------------------------------------------|-----------------------------------------------------------------------|--------------|
| Zm00001d018779 | oxygen-evolving enhancer protein 2, chloroplastic         | F: 5'- CAAGCAGTACTACGCCGTGTCG-3';<br>R: 5'- CAAGCAGTACTACGCCGTGTCG-3' | 13.18-fold   |
| Zm00001d041819 | photosystem I reaction center subunit N, chloroplastic    | F: 5'- CTTCTCATCCTGTGCCGTGT-3';<br>R: 5'- GCTGCTAGCTGCTTCACCACT-3'    | 9.77-fold    |
| Zm00001d006540 | oxygen-evolving enhancer protein 3, chloroplastic         | F: 5'- GCAAGCTCTTCAGCACCAT-3';<br>R: 5'- CCATCTAGGCTAGCTTGGC-3'       | 10.51-fold   |
| Zm00001d043299 | oxygen-evolving enhancer protein 3, chloroplastic         | F: 5'- TCCAGCAAAAGAGATCGAGA-3';<br>R: 5'- ATATGCGAGCGTGAAAGTGA-3'     | 8.49-fold    |
| Zm00001d020877 | photosystem I reaction center subunit V, chloroplastic    | F: 5'- CCACCTCAAGCAACGGATAC-3';<br>R: 5'- AAATCCATGTACACGCGCAG-3'     | 6.6-fold     |
| Zm00001d008706 | photosystem I reaction center subunit XI, chloroplastic   | F: 5'- GTGCTCTGGGCCTACTTTCT-3';<br>R: 5'- CAATCCATCCATGTGCAAAG-3'     | 9.95-fold    |
| Zm00001d018797 | photosystem I reaction center subunit psaK, chloroplastic | F: 5'- TCAGACTCAGCAGCCTCGAT-3';<br>R: 5'- AACAGGAGCTATATGTCCATTGG-3'  | 8.52-fold    |
| Zm00001d039687 | photosystem I reaction center subunit XI, chloroplastic   | F: 5'- TTTCAGCAGTGACGAGCATC-3';<br>R: 5'- ATGGCATTTCCTAGCTGGTT-3'     | 8.55-fold    |
| Zm00001d021703 | oxygen-evolving enhancer protein 3, chloroplastic         | F: 5'- TGAGATCTGGGAACAGTGCA-3';<br>R: 5'- CATTATTAGCCCTTGCGTCT-3'     | 3.3-fold     |
| Zm00001d029049 | photosystem II repair protein PSB27-H1, chloroplastic     | F: 5'- CGAGGAATACGTGAGCGAGA-3';<br>R: 5'- AGCTGATGTAATGGCCCGAC-3'     | 3.69-fold    |
| Zm00001d014564 | oxygen-evolving enhancer protein 1, chloroplastic         | F: 5'- TGAGCGTCACCAAGAGCAAC-3';<br>R: 5'- AAGTTCTCCATGACGGTCCG-3'     | 5.27-fold    |
| Zm00001d049387 | photosystem II 10 kDa polypeptide, chloroplastic          | F: 5'- GCTGCGTACGTGATAGATCG-3';<br>R: 5'- GCTGATGGGCAAGCAATAAG-3'     | 6.4-fold     |

|                |                                                           |                                                                    |            |
|----------------|-----------------------------------------------------------|--------------------------------------------------------------------|------------|
| Zm00001d013039 | photosystem I reaction center subunit II, chloroplastic   | F: 5'- CCCATCGACGTCAAGTTCA-3';<br>R: 5'- CAAATTACACATCCATGTCCAC-3' | 14.05-fold |
| Zm00001d005446 | photosystem I reaction center subunit IV B, chloroplastic | F: 5'- CTACGCCTTGGACGAGATC -3';<br>R: 5'- TTGAGTCCACGGTGAATGAA-3'  | 11.3-fold  |
| Zm00001d036535 | oxygen-evolving enhancer protein 1, chloroplastic         | F: 5'- GGTAAGCACGCATGCATTGT-3';<br>R: 5'- TCACCTCCATGTACGTTTTGC-3' | 4.49-fold  |

---
